# Supplementary material for: Kisspeptin enhances brain responses to olfactory and visual cues of attraction in men
Source: PubMed Central journal article supplement (PMC7098781; doi:10.1172/jci.insight.133633), 2020-02-13
Supplement: jciinsight-5-133633-s197.pdf [file jciinsight-5-133633-s197.pdf]

1 **Kisspeptin Enhances Brain Responses to Olfactory and Visual Cues of Attraction in Men**

2 **Authors:** Lisa Yang<sup>1#</sup>, Lysia Demetriou<sup>1,2#</sup>, Matthew B Wall<sup>2,3,4</sup>, Edouard GA Mills<sup>1</sup>, David Zargaran<sup>1</sup>, Mark  
3 Sykes<sup>1</sup>, Julia K Prague<sup>1</sup>, Ali Abbara<sup>1</sup>, Bryn M Owen<sup>1</sup>, Paul A Bassett<sup>5</sup>, Eugenii A Rabiner<sup>2,6</sup>, Alexander N  
4 Comninou<sup>1,7\*</sup>, Waljit S Dhillon<sup>1\*</sup>.

5 **# Joint first authors**

6 **Affiliations:**

7 <sup>1</sup> Section of Endocrinology & Investigative Medicine, Imperial College London, UK. <sup>2</sup> Invicro, Hammersmith  
8 Hospital, London, UK. <sup>3</sup> Division of Brain Sciences, Imperial College London, UK. <sup>4</sup> Clinical Psychopharmacology  
9 Unit, University College London, UK. <sup>5</sup> Statsconsultancy Ltd, Bucks., UK. <sup>6</sup> Centre for Neuroimaging Sciences,  
10 Institute of Psychiatry, Psychology and Neuroscience, King's College, London, UK. <sup>7</sup> Department of  
11 Endocrinology, Imperial College Healthcare NHS Trust, London, UK.

12 **Corresponding authors:**

13 Dr Alexander N. Comninou: [a.comninou@imperial.ac.uk](mailto:a.comninou@imperial.ac.uk)

14 & Professor Waljit S. Dhillon: [w.dhillon@imperial.ac.uk](mailto:w.dhillon@imperial.ac.uk)

15 Department of Investigative Medicine,  
16 Imperial College London,  
17 6th Floor, Commonwealth Building,  
18 Hammersmith Hospital Campus, Du Cane Road,  
19 London, W12 ONN, UK.  
20 Tel: +44 208 383 3242.

21 **Conflict of Interest Statement:** The authors have declared that no conflict of interest exists.

22 Publishing under Creative Commons CC-BY license required.

23 **Supplementary Figures and Tables**

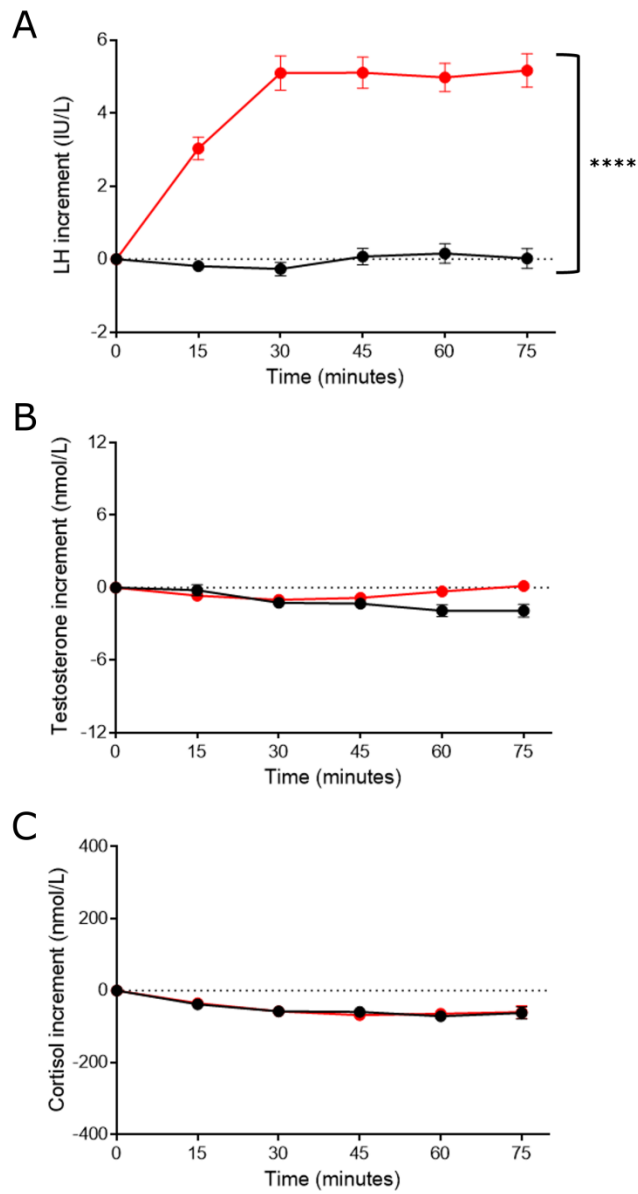

24 **Supplemental Figure S1. Effects of kisspeptin administration on hormone levels.**

25 **(A)** Kisspeptin increased circulating LH levels. Kisspeptin had no effect on circulating **(B)** testosterone and **(C)** cortisol levels

26 in the blood. Data depict mean±SEM. \*\*\*\* $P < 0.0001$ , two-way ANOVA,  $n = 33$ .

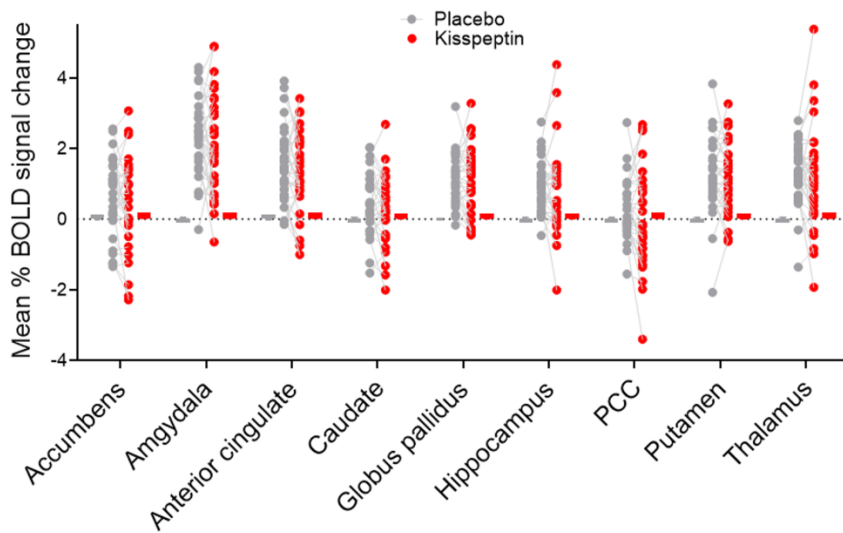

27 **Supplemental Figure S2. Mean % BOLD signal change in *a priori* anatomically defined ROIs during facial**  
 28 **attractiveness task.**

29 ROI analysis based on *a priori* defined brain regions comprising areas known to express kisspeptin receptors and areas  
 30 involved in sexual arousal showed no significant effect of kisspeptin across all face conditions. Data in graph depict within  
 31 participant raw data, mean±SEM.  $n=33$ .

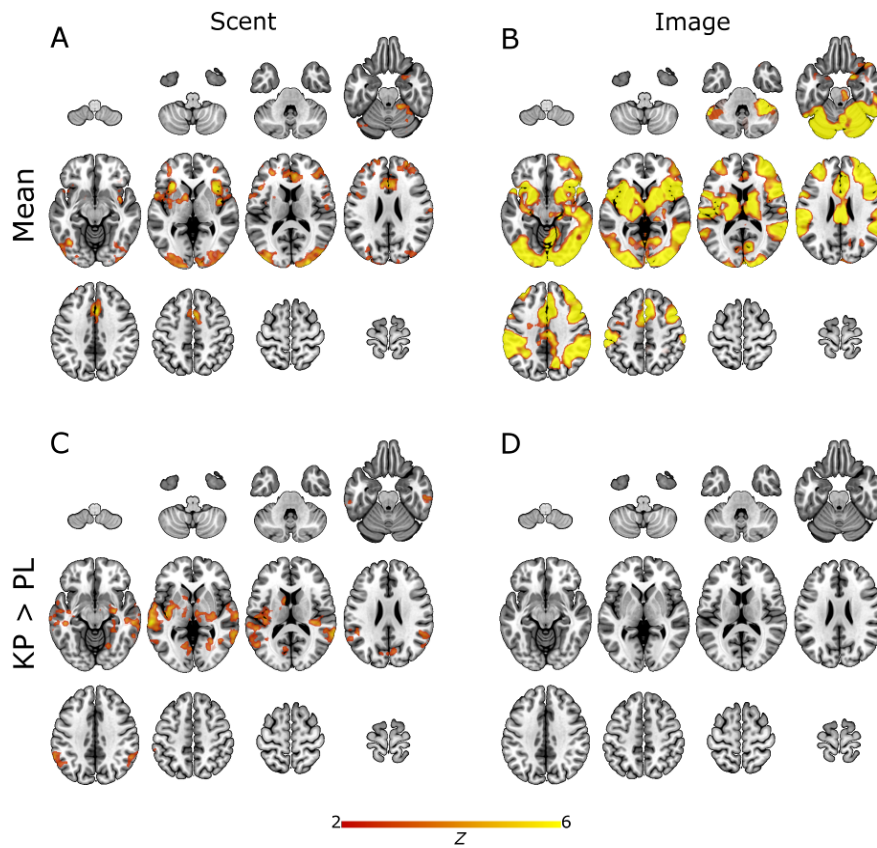

32 **Supplemental Figure S3. Task effects and kisspeptin modulation of these effects in response to the olfactory task.**  
 33 **(A-B)** Analyses of the main effects of stimulus type (all subjects, both treatments averaged) for **(A)** scent and **(B)** image  
 34 trials. **(C-D)** Within-subject analyses of the effect of kisspeptin (KP) vs. placebo (PL) for **(C)** scent and **(D)** image trials.  
 35 Positive voxel values represent an increase in activity during kisspeptin infusion. All statistical maps thresholded at  $Z=2.3$ ,  
 36  $P<0.05$  (cluster corrected for multiple comparisons),  $n=33$ .

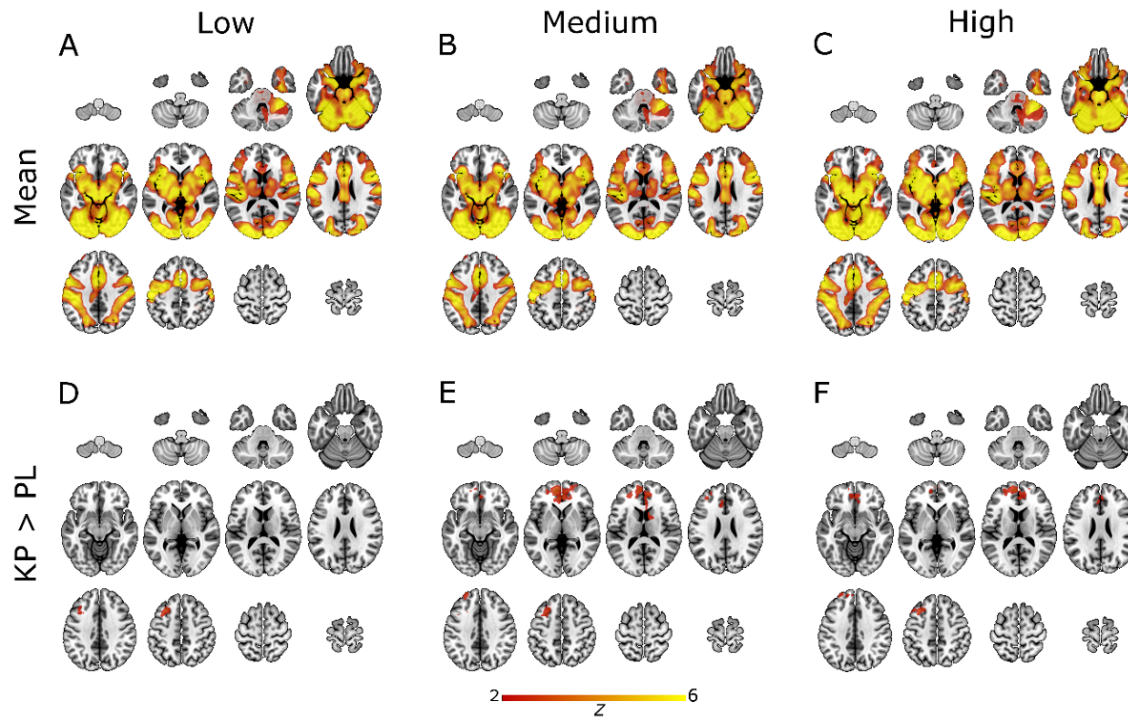

37 **Supplemental Figure S4. Task effects and kisspeptin modulation of these effects in response to facial**  
 38 **attractiveness.**

39 **(A-C)** Analyses of the main effects of stimulus type (all subjects, both treatments averaged) for low, medium and high  
 40 attractiveness faces (A-C, respectively). **(D-F)** Within-subject analyses of the effect of kisspeptin (KP) vs. placebo (PL) for  
 41 low, medium and high attractiveness faces. Positive voxel values represent an increase in activity during kisspeptin infusion.  
 42 All statistical maps thresholded at  $Z=2.3$ ,  $P<0.05$  (cluster corrected for multiple comparisons),  $n=33$ .

43 **Supplemental Table S1: Participant clinical and psychometric characteristics.**

|                                                     |                          | <b>Healthy Men<br/>(n = 33)</b> |
|-----------------------------------------------------|--------------------------|---------------------------------|
|                                                     |                          | Mean±SEM                        |
| <b>Age (years)</b>                                  |                          | 24.6 ± 0.7                      |
| <b>BMI (kg/m<sup>2</sup>)</b>                       |                          | 22.9 ± 0.3                      |
| <b>Baseline Reproductive Hormones</b>               |                          |                                 |
|                                                     | Kisspeptin (pmol/L)      | 17.9 ± 2.4                      |
|                                                     | LH (IU/L)                | 2.9 ± 0.2                       |
|                                                     | FSH (IU/L)               | 2.9 ± 0.3                       |
|                                                     | Testosterone (nmol/L)    | 20.8 ± 1.0                      |
|                                                     | Cortisol                 | 302.5 ± 13.3                    |
| <b>Number of sexual partners in the last year</b>   |                          | 1.8 ± 0.3                       |
| <b>Frequency of sexual intercourse per month</b>    |                          | 5.6 ± 0.9                       |
| <b>Hours viewing pornographic material per week</b> |                          | 1.1 ± 0.2                       |
| <b>PHQ-9</b>                                        |                          | 1.2 ± 0.2                       |
| <b>BIS</b>                                          |                          | 19.4 ± 0.6                      |
| <b>BAS</b>                                          |                          |                                 |
|                                                     | Drive                    | 11.8 ± 0.3                      |
|                                                     | Fun                      | 12.4 ± 0.4                      |
|                                                     | Reward                   | 17.5 ± 0.3                      |
| <b>IIEF</b>                                         |                          |                                 |
|                                                     | Erectile Function        | 26.8 ± 1.0                      |
|                                                     | Orgasmic Function        | 8.7 ± 0.4                       |
|                                                     | Sexual Desire            | 7.8 ± 0.2                       |
|                                                     | Intercourse Satisfaction | 10.5 ± 0.8                      |
|                                                     | Overall Score            | 8.4 ± 0.3                       |
| <b>STAI-Y Trait</b>                                 |                          | 37.1 ± 1.3                      |
| <b>SDI (Sexual Desire Inventory)</b>                |                          |                                 |
|                                                     | Dyadic                   | 47.2 ± 1.5                      |
|                                                     | Solitary                 | 17.4 ± 0.9                      |
|                                                     | Total                    | 68.4 ± 2.2                      |
| <b>SQOL</b>                                         |                          | 80.4 ± 2.4                      |
| <b>SwLS</b>                                         |                          | 24.8 ± 0.8                      |
| <b>SHS</b>                                          |                          | 17.6 ± 0.4                      |
| <b>Baseline Scent Ratings</b>                       |                          |                                 |
|                                                     | Pleasant                 | 3.4 ± 0.1                       |
|                                                     | Feminine                 | 4.7 ± 0.2                       |

44 BMI = Body Mass Index; LH = Luteinizing Hormone; FSH = Follicle Stimulating Hormone; PHQ-9 = Patient Health  
45 Questionnaire-9 to screen for depression; BIS = Behavioral Inhibition System Scale to assess sensitivity to anticipation of  
46 punishment; BAS = Behavioral Activation System Scale to assess sensitivity to desired goals, fun and reward; IIEF =  
47 International Index of Erectile Function to screen for normal male sexual function; STAI-Y Trait = State-Trait Anxiety  
48 Inventory to assess trait anxiety; SDI = Sexual Desire Inventory to assess dyadic (i.e. with partner) and solitary sexual desire;  
49 SQOL = Sexual Quality of Life score; SwLS = Satisfaction with Life Scale to assess satisfaction with life as a whole; SHS =  
50 Subjective Happiness Scale. Results confirmed no active depression, anxiety trait or underlying erectile disorder that could  
51 affect fMRI analysis. Baseline scent ratings scored on a scale of 0 to 5. Pleasantness: 0 = very unpleasant, 5 = very pleasant.  
52 Feminine: 0 = masculine scent, 5 = feminine scent. Data presented as mean±SEM.

53 **Supplemental Table S2: Baseline clinical and psychometric characteristics on kisspeptin and placebo visits.**

|                                       | <b>Kisspeptin Visit<br/>(n = 33)</b> | <b>Placebo Visit<br/>(n = 33)</b> |
|---------------------------------------|--------------------------------------|-----------------------------------|
|                                       | Mean ± SEM                           | Mean ± SEM                        |
| <b>Baseline Reproductive Hormones</b> |                                      |                                   |
| Kisspeptin (pmol/L)                   | 21.1 ± 4.0                           | 14.7 ± 1.5                        |
| LH (IU/L)                             | 2.9 ± 0.2                            | 3.0 ± 0.2                         |
| FSH (IU/L)                            | 3.0 ± 0.3                            | 2.9 ± 0.3                         |
| Testosterone (nmol/L)                 | 21.3 ± 1.1                           | 20.2 ± 1.1                        |
| Cortisol (nmol/L)                     | 295.2 ± 16.1                         | 309.8 ± 15.2                      |
| <b>Baseline SADI scores</b>           |                                      |                                   |
| Evaluative                            | 27.2 ± 4.0                           | 28.9 ± 3.8                        |
| Negative                              | 16.2 ± 2.8                           | 18.1 ± 2.8                        |
| Physiological                         | 15.5 ± 2.7                           | 16.7 ± 2.6                        |
| Motivational                          | 14.5 ± 2.6                           | 15.7 ± 2.3                        |
| <b>Baseline POMS2A scores</b>         |                                      |                                   |
| Total Mood Disturbance                | 45.4 ± 1.3                           | 45.2 ± 1.4                        |
| Anger-Hostility                       | 40.4 ± 0.9                           | 41.0 ± 1.0                        |
| Confusion-Bewilderment                | 42.4 ± 1.2                           | 42.2 ± 0.9                        |
| Depression-Dejection                  | 43.9 ± 1.0                           | 43.6 ± 0.8                        |
| Fatigue-Inertia                       | 41.5 ± 1.3                           | 41.9 ± 1.5                        |
| Tension-Anxiety                       | 43.5 ± 1.4                           | 44.4 ± 1.7                        |
| Vigor-Activity                        | 42.7 ± 1.5                           | 45.7 ± 1.9                        |
| Friendliness                          | 47.4 ± 1.8                           | 50.7 ± 1.6                        |

54 LH = Luteinizing Hormone, FSH = Follicle Stimulating Hormone, SADI = Sexual Arousal and Desire Inventory, POMS2A =  
55 Profile of Mood States 2 for Adults. *n*=17 participants received placebo and *n*=16 received kisspeptin at first visit. No  
56 significant difference in parameters between visits assessed by multi-level linear regression, adjusted for visit order.  
57 Hormone levels were within the normal expected physiological ranges. Data presented as mean±SEM.

58 **Supplemental Table S3: Change in psychometric scores during kisspeptin and placebo visits.**

|                                | <b>Kisspeptin Visit<br/>(n = 33)</b> | <b>Placebo Visit<br/>(n = 33)</b> |
|--------------------------------|--------------------------------------|-----------------------------------|
|                                | Mean ± SEM                           | Mean ± SEM                        |
| <b>Change in SADI scores</b>   |                                      |                                   |
| Evaluative                     | 0.0 ± 2.9                            | 3.0 ± 3.2                         |
| Negative                       | 0.8 ± 1.4                            | -1.8 ± 1.8                        |
| Physiological                  | 1.7 ± 1.4                            | 3.3 ± 2.0                         |
| Motivational                   | -0.3 ± 1.4                           | -0.1 ± 1.7                        |
| <b>Change in POMS2A scores</b> |                                      |                                   |
| Total Mood Disturbance         | 1.4 ± 1.3                            | -0.6 ± 1.0                        |
| Anger-Hostility                | 0.7 ± 0.7                            | -0.5 ± 0.4                        |
| Confusion-Bewilderment         | 1.3 ± 1.3                            | 0.5 ± 0.8                         |
| Depression-Dejection           | -1.1 ± 0.5                           | -0.8 ± 0.6                        |
| Fatigue-Inertia                | 3.4 ± 1.9                            | 1.6 ± 1.3                         |
| Tension-Anxiety                | -3.5 ± 1.0                           | -5.6 ± 1.1                        |
| Vigor-Activity                 | -3.7 ± 1.8                           | -2.1 ± 2.0                        |
| Friendliness                   | -4.1 ± 1.7                           | -3.5 ± 1.1                        |

59 SADI = Sexual Arousal and Desire Inventory, POMS2A = Profile of Mood States 2 for Adults. *n*=17 participants received  
60 placebo and *n*=16 received kisspeptin at first visit. No significant difference in parameters between visits assessed by multi-  
61 level linear regression, adjusted for visit order. Data presented as mean±SEM.



62 **Supplemental Table S4: Structures with enhanced activation by kisspeptin on whole brain analysis.**

| Contrast                          |                                  | Region | Cluster Peak (MNI152 Space) |     |     |      |    |   |
|-----------------------------------|----------------------------------|--------|-----------------------------|-----|-----|------|----|---|
|                                   |                                  |        | Right                       |     |     | Left |    |   |
| Kisspeptin > Placebo              |                                  |        | x                           | y   | z   | x    | y  | z |
| <b>Olfactory Task</b>             |                                  |        |                             |     |     |      |    |   |
| Scent                             | Putamen                          | 32     | -16                         | 4   | -32 | -6   | 4  |   |
|                                   | Globus Pallidus                  | 24     | -20                         | 38  | -24 | -8   | 4  |   |
|                                   | Insula                           | 34     | -22                         | 6   | -40 | -16  | -2 |   |
|                                   | Caudate                          |        |                             |     | -8  | 6    | 10 |   |
|                                   | Amygdala                         | 20     | -8                          | -14 |     |      |    |   |
|                                   | Thalamus                         | 6      | -16                         | 2   | -8  | -12  | 6  |   |
|                                   | Posterior Cingulate Cortex (PCC) | 26     | -58                         | 6   | -10 | -70  | 14 |   |
|                                   | Superior Temporal Gyrus          | 66     | -20                         | 0   | -64 | -28  | 0  |   |
|                                   | Middle Temporal Gyrus            | 60     | -30                         | -8  | -50 | -30  | -8 |   |
| Heschl's Gyrus                    | 44                               | -22    | 8                           | -40 | -28 | 10   |    |   |
| <b>Facial Attractiveness Task</b> |                                  |        |                             |     |     |      |    |   |
| Low Attractiveness                | Superior Frontal Gyrus           |        |                             |     | -28 | 20   | 46 |   |
| Medium Attractiveness             | Medial Prefrontal Cortex         | 6      | 56                          | 6   | -10 | 54   | 8  |   |
|                                   | Superior Frontal Gyrus           | -22    | 32                          | 46  |     |      |    |   |
|                                   | Anterior Cingulate Gyrus         | 4      | 24                          | 18  | -4  | 24   | 18 |   |
| High Attractiveness               | Medial Prefrontal Cortex         | 6      | 56                          | 8   | -12 | 54   | 8  |   |
|                                   | Superior Frontal Gyrus           |        |                             |     | -22 | 30   | 46 |   |

63 Data derived from whole brain analysis during the olfactory task for the scent trials and the facial attractiveness tasks for  
64 low, medium and high attractiveness images ( $n=33$ ). Co-ordinates represented by x, y, z are derived from the MNI152  
65 stereotactic coordinate space. Coordinates represent the center of discrete activation clusters observed in the group-level  
66 analyses of treatment effects (kisspeptin vs. placebo), with statistical maps thresholded at  $Z = 2.3$ ,  $P < 0.05$  (cluster-corrected  
67 for multiple comparisons).
